# Supplementary material for: Quadruple Hydrogen Bond-Containing A-AB-A Triblock Copolymers: Probing the Influence of Hydrogen Bonding in the Central Block
Source: MDPI journal article supplement (doi:10.3390/molecules26154705), 2021-08-03
Supplement: s1 [file s1]

# Quadruple Hydrogen Bond-Containing A-AB-A triblock Copolymers: Probing the Influence of Hydrogen Bonding in the Central Block

Boer Liu<sup>1</sup>, Xi Chen<sup>2</sup>, Glenn A. Spiering<sup>2</sup>, Robert B. Moore<sup>2</sup>, and Timothy E. Long<sup>1\*</sup>

<sup>1</sup>*Biodesign Center for Sustainable Macromolecular Materials and Manufacturing, School of Molecular Sciences*

*Arizona State University, Tempe AZ 85281, USA*

<sup>2</sup>*Department of Chemistry, Macromolecules Innovation Institute (MII), Virginia Tech, Blacksburg, VA 24061, USA*

\*To whom correspondence should be addressed: E-mail: Timothy.E.Long@asu.edu.

## Supplementary Materials

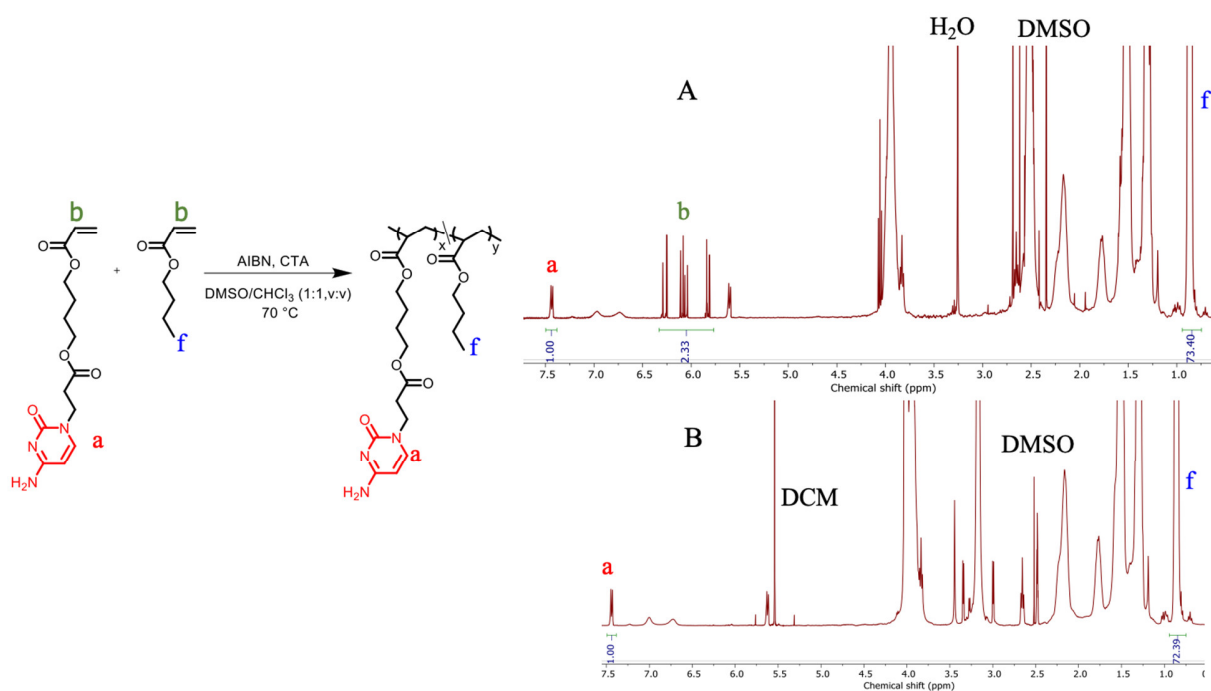

**Figure S1.** <sup>1</sup>H NMR spectroscopy of poly(CyA-co-nBA) macro-CTA. (A) The crude product in DMSO-*d*<sub>6</sub> from reaction solution for conversion calculation and (B) purified polymer in DMSO-*d*<sub>6</sub> + CDCl<sub>3</sub> for determining molecular weight.

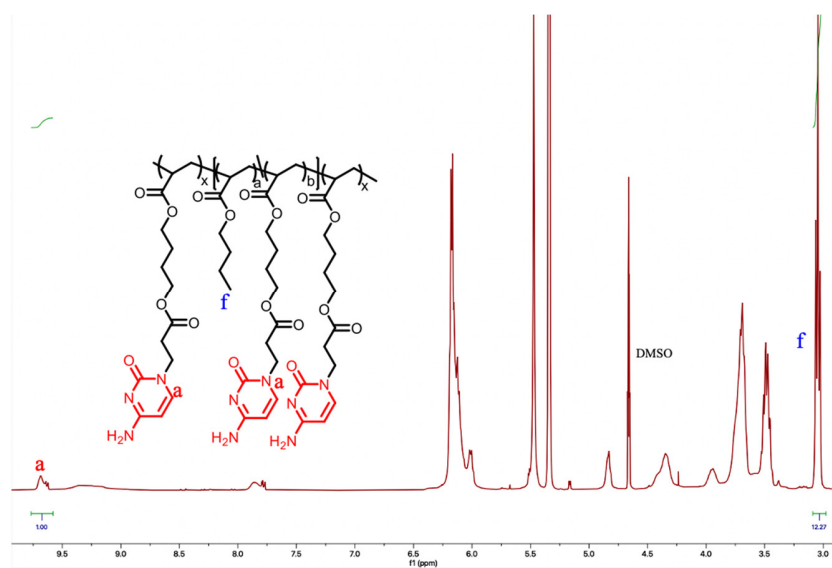

**Figure S2.**  $^1\text{H}$  NMR spectroscopy of purified  $\text{C}_{50}\text{-}b\text{-(B}_{480}\text{-co-C}_{20})\text{-}b\text{-C}_{50}$  in  $\text{DMSO-}d_6 + \text{CDCl}_3$ .

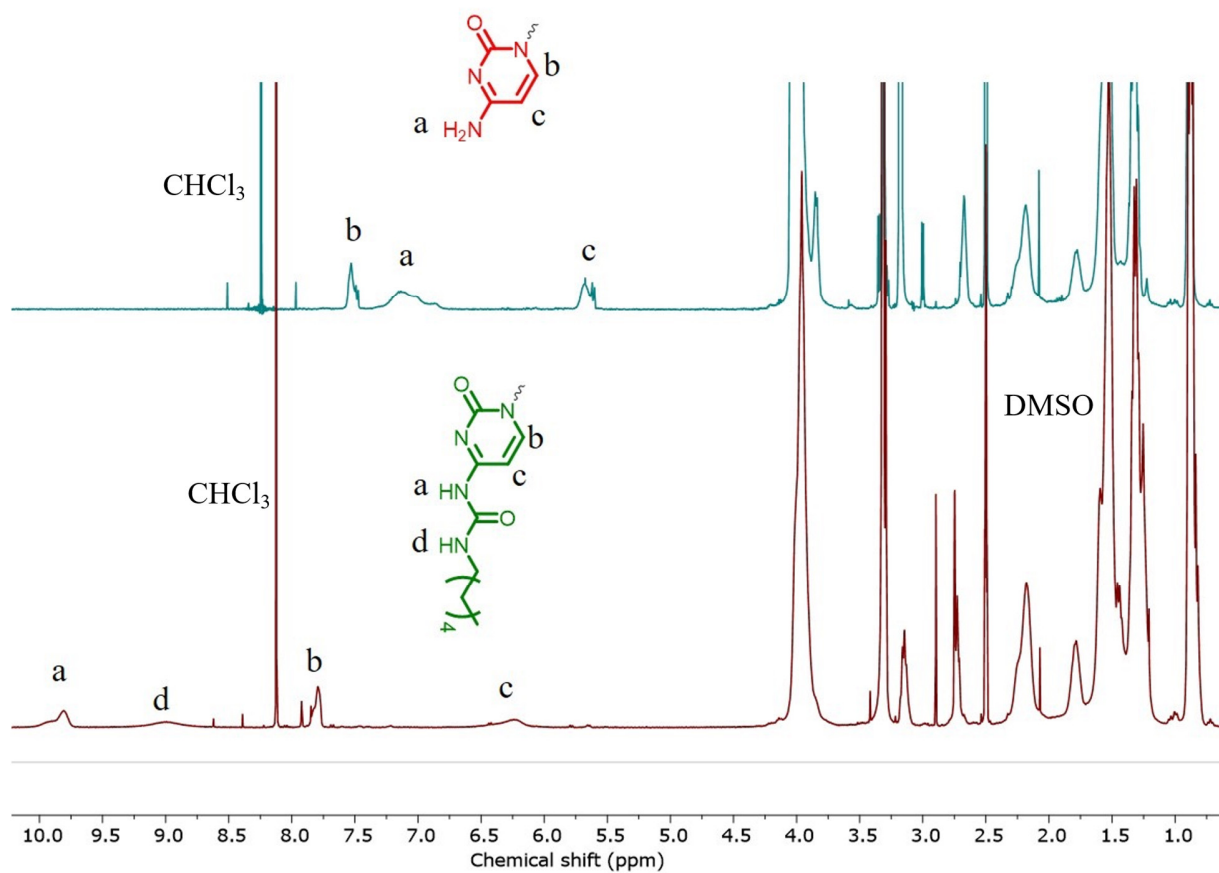

**Figure S3.**  $^1\text{H}$  NMR spectroscopy of the purified  $\text{C}_{50}\text{-}b\text{-(B}_{480}\text{-}co\text{-C}_{20})\text{-}b\text{-C}_{50}$  and  $\text{U}_{50}\text{-}b\text{-(B}_{480}\text{-}co\text{-U}_{20})\text{-}b\text{-U}_{50}$  in  $\text{DMSO-}d_6 + \text{CDCl}_3$ .

### Calculation of Monomer Conversion

$$A = \frac{DP_{CyA}}{DP_{CyA} + DP_{nBA}} \quad (\text{S1})$$

$$B = \frac{Feed_{CyA}}{Feed_{CyA} + Feed_{nBA}} \quad (\text{S2})$$

$$C = \frac{DP_{CyA} + DP_{nBA}}{Feed_{CyA} + Feed_{nBA}} \quad (\text{S3})$$

where A and B are the molar percentage of CyA in the copolymer and feed, respectively (**Table S1**). C stands for the overall conversion of the monomer (**Table S1**).

Take the ratio of eq. S1 and S2 yielded eq S4:

$$\frac{A}{B} = \frac{DP_{CyA}}{Feed_{CyA}} \frac{Feed_{CyA} + Feed_{nBA}}{DP_{CyA} + DP_{nBA}} = conv_{CyA} (1/C) \quad (\text{S4})$$

where the ratio of  $DP_{CyA}$  and  $Feed_{CyA}$  is the conversion of CyA,  $conv_{CyA}$ .

Therefore, rearranging eq. S4 affords the expression of  $conv_{CyA}$  (eq S5):

$$conv_{CyA} = \frac{A \times C}{B} \quad (\text{S5})$$

Similarly, the expression of  $nBA$  conversion is shown in eq S6:

$$conv_{nBA} = \frac{(1-A) \times C}{1-B} \quad (\text{S6})$$

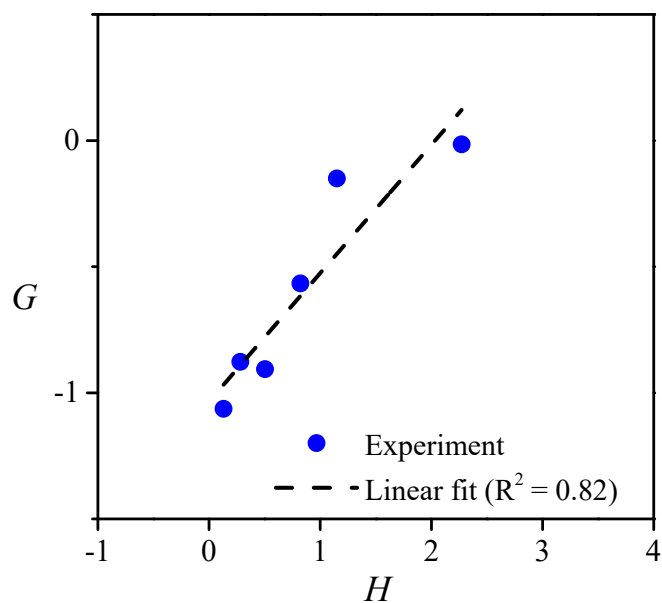

**Figure S4.** Determination of reactivity ratios for the copolymerization of CyA and *n*BA using the Fineman–Ross method.

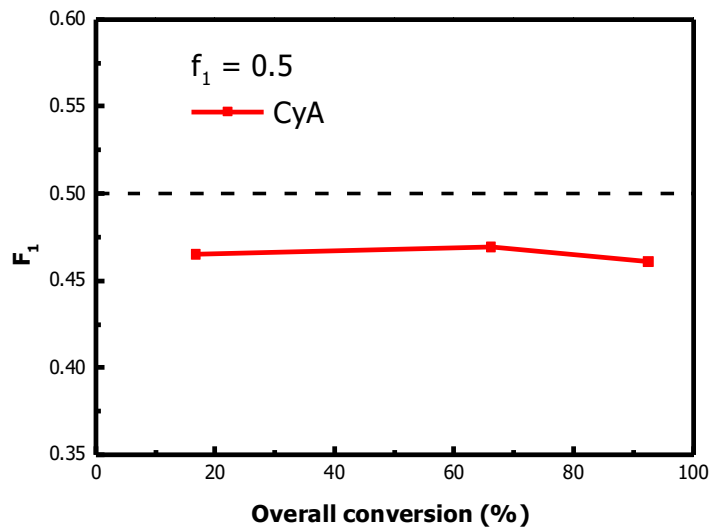

**Figure S5.** Fraction of CyA segment in the polymer as a function of overall conversion.

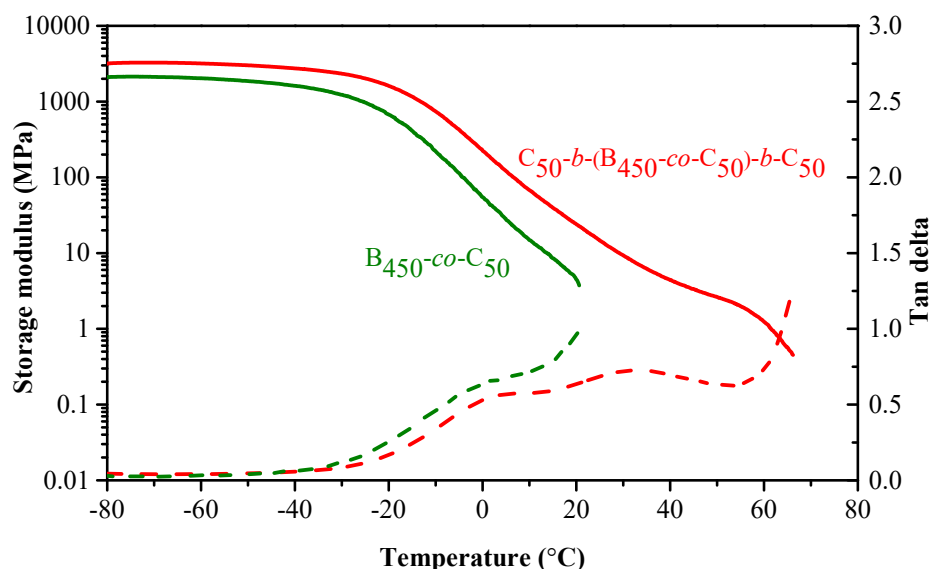

**Figure S6.** Dynamic mechanical temperature ramps of storage modulus and tan  $\delta$  of the solution cast  $C_{50}-b-(B_{450}-co-C_{50})-b-C_{50}$  and  $B_{450}-co-C_{50}$ .

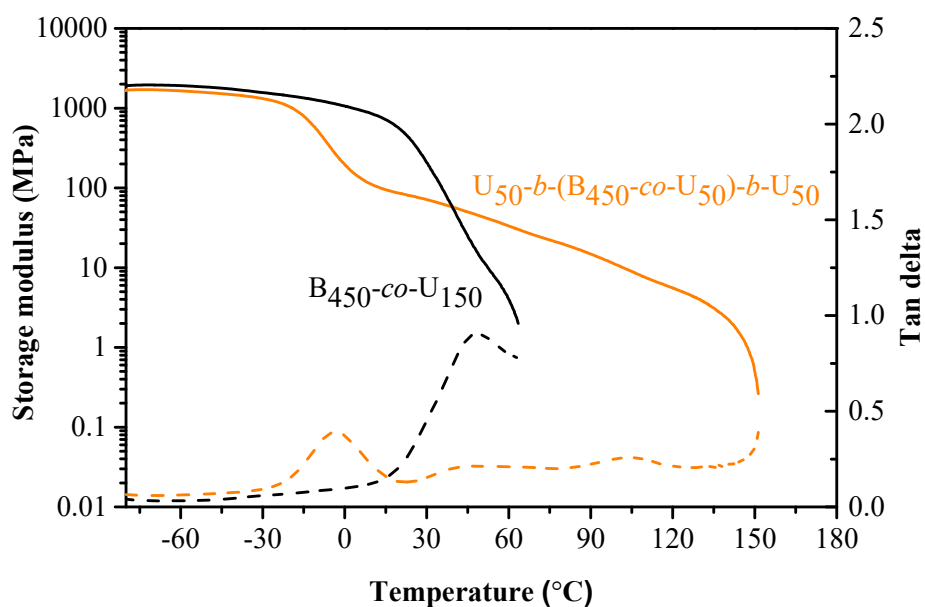

**Figure S7.** Dynamic mechanical temperature ramps of storage modulus and tan  $\delta$  of the solution cast  $U_{50}-b-(B_{450}-co-U_{50})-b-U_{50}$  and  $B_{450}-co-U_{150}$ .

**Table S1.** Compositions and thermal properties of CyA and UCyA copolymer macro-CTA with varying amounts of hydrogen bonding content

|                                      | CyA in<br>feed, $f_{\text{CyA}}$<br>(mol %) | CyA/UCyA in<br>copolymer, $F_{\text{CyA}}$<br>(mol %) <sup>a</sup> | Overall<br>conversion<br><sup>a</sup> (%) | Feed    | DP <sup>a</sup> | T <sub>g</sub> <sup>b</sup><br>(°C) |
|--------------------------------------|---------------------------------------------|--------------------------------------------------------------------|-------------------------------------------|---------|-----------------|-------------------------------------|
| B <sub>480</sub> -co-C <sub>20</sub> | 4                                           | 4                                                                  | 97                                        | 501/23  | 488/20          | -38                                 |
| B <sub>450</sub> -co-C <sub>50</sub> | 14                                          | 10                                                                 | 86                                        | 505/79  | 453/50          | -23                                 |
| B <sub>420</sub> -co-C <sub>80</sub> | 22                                          | 16                                                                 | 82                                        | 473/131 | 418/78          | 0                                   |
| B <sub>480</sub> -co-U <sub>20</sub> | N/A                                         | 4                                                                  | N/A                                       | N/A     | 488/20          | -39                                 |
| B <sub>450</sub> -co-U <sub>50</sub> | N/A                                         | 10                                                                 | N/A                                       | N/A     | 453/50          | -26                                 |
| B <sub>420</sub> -co-U <sub>80</sub> | N/A                                         | 16                                                                 | N/A                                       | N/A     | 420/78          | -10                                 |

<sup>a</sup><sup>1</sup>H NMR spectroscopy

<sup>b</sup>DSC, 10 °C min<sup>-1</sup>, -60 – 150 °C, N<sub>2</sub>.

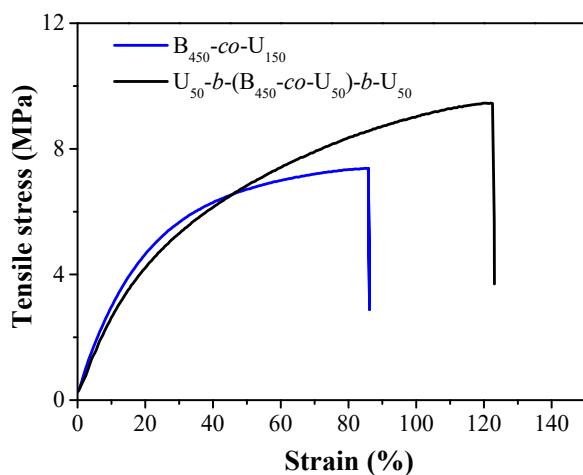

**Figure S8.** Stress-strain curves of B<sub>450</sub>-co-U<sub>150</sub> and U<sub>50</sub>-b-(B<sub>450</sub>-co-U<sub>50</sub>)-b-U<sub>50</sub>.

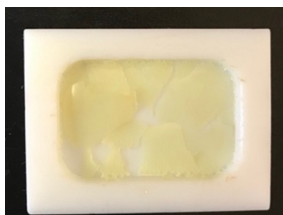

**Figure S9.** The cracked film of  $U_{75}-b-B_{450}-b-U_{75}$  during thermal annealing.

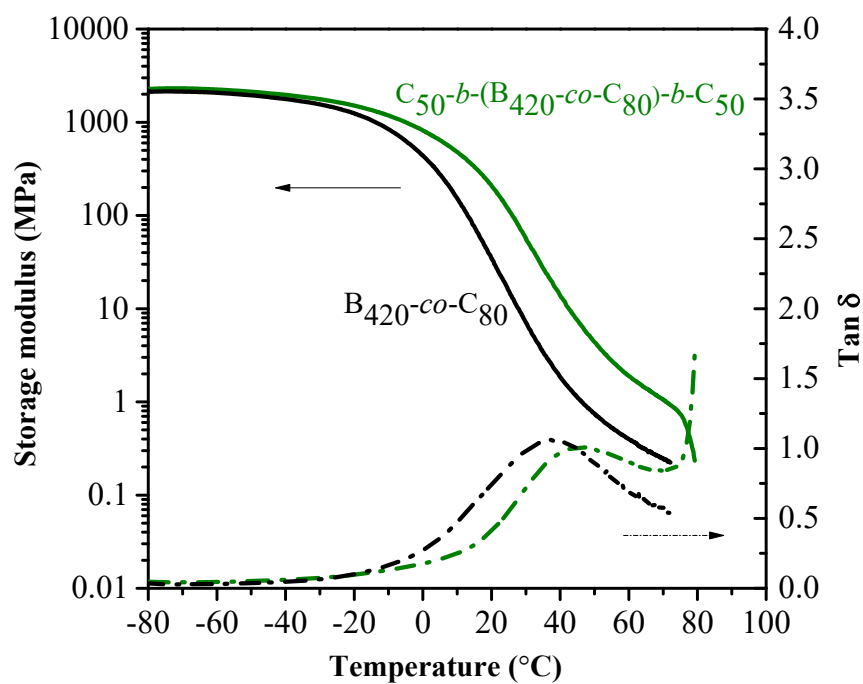

**Figure S10.** Dynamic mechanical temperature ramps of storage modulus and  $\tan \delta$  of the solution cast  $C_{50}-b-(B_{420}-co-C_{80})-b-C_{50}$  and  $B_{420}-co-C_{80}$

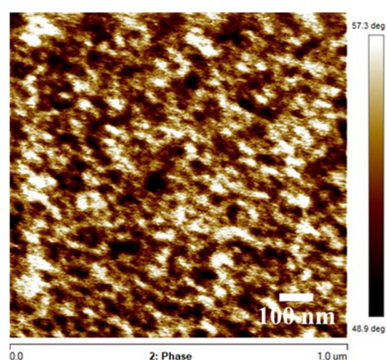

**Figure S11.** AFM phase image for the solution casted  $C_{50}-b-(B_{450}-co-C_{50})-b-C_{50}$  film.
